# Supplementary material for: Covalent modification of Keap1 at Cys77 and Cys434 by pubescenoside a suppresses oxidative stress-induced NLRP3 inflammasome activation in myocardial ischemia-reperfusion injury
Source: PubMed Central journal article supplement (PMC7738871; doi:10.7150/thno.48436), 2021-01-01
Supplement: thnov11p0861s1.pdf [file thnov11p0861s1.pdf]

## Supplementary data

### Covalent modification of Keap1 at Cys77 and Cys434 by pubescenside A suppresses oxidative stress-induced NLRP3 inflammasome activation in myocardial ischemia-reperfusion injury

Yuanyuan Cheng#, Liangkai Cheng#, Xiang Gao, Sixuan Chen, Peng Wu, Caiyan Wang, Zhongqiu Liu

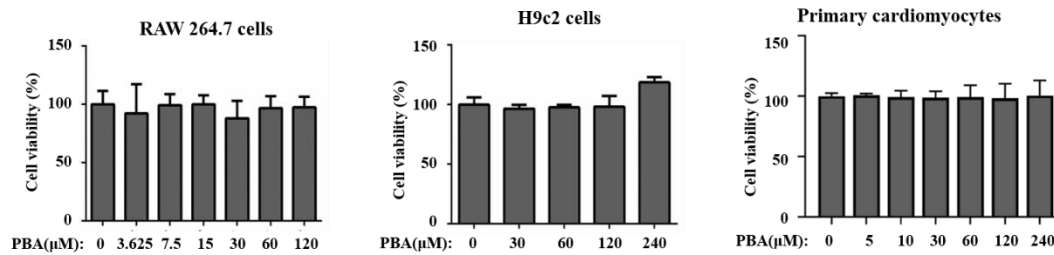

**Figure S1.** The cytotoxicity of PBA on RAW264.7, H9c2 cells and primary cardiomyocytes. Cells were seeded in 96-well plates, and treated with indicated concentrations of PBA. After 48 h, the cell viability was measured by MTT assays.

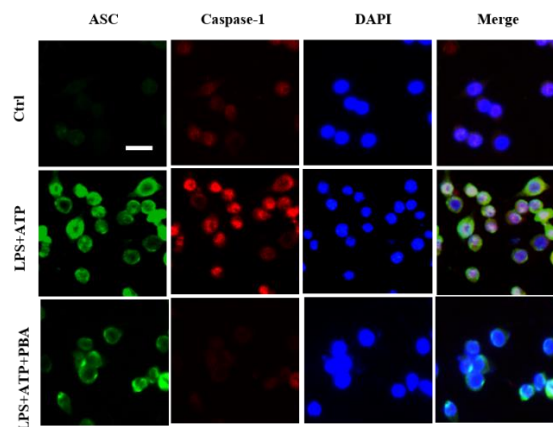

**Figure S2.** Immunofluorescent staining of NLRP3 inflammasome in LPS plus ATP-induced RAW264.7 macrophages.

**Figure S3.**

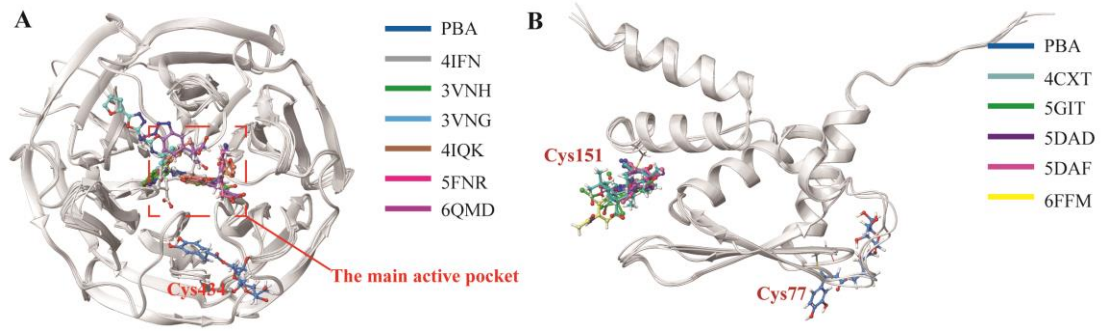

**Figure S4. Compare of the difference between PBA and Keap1-Kelch, Keap1-BTB complexes with other compounds.** (A) Alignment of PBA and Keap1-Kelch complexes with other six compounds. Navy blue carbon skeleton representation of PBA. The compound of gray carbon skeleton PDB ID: 4IFN, the compound of green carbon skeleton PDB ID: 3VNH, The compound of light blue carbon skeleton PDB ID: 3VNG. The compound of brown carbon skeleton PDB ID: 4IQK. The compound of magenta carbon skeleton PDB ID: 5FNR. The compound of purple carbon skeleton PDB ID: 6QMD. (B) Alignment of PBA and Keap1-BTB complexes with other five compounds. The compound of steelblue carbon skeleton PDB ID: 4CXT, The compound of green carbon skeleton PDB ID: 5GIT, The compound of purple carbon skeleton PDB ID: 5DAD, The compound of magenta carbon skeleton PDB ID: 5DAF, The compound of yellow carbon skeleton PDB ID: 6FFM.

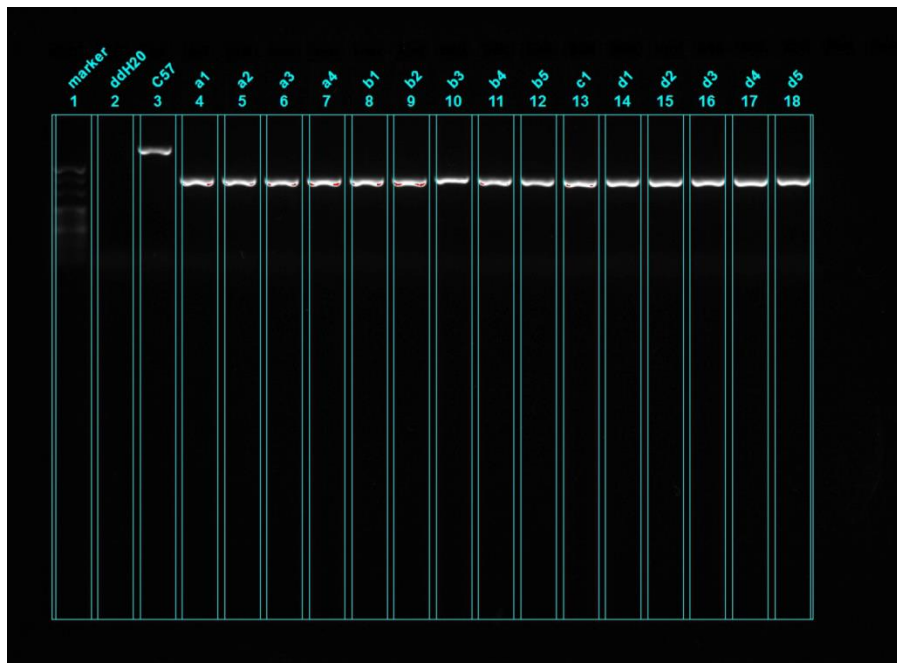

**Figure S5. Animal genotyping  $Nrf2^{-/-}$**

**Table S1 MS data for modification peptides of Keap1.**

| <i>Master</i>         | Accession          | Description                                                             | Exp. q-value | Sum PEP Score   | Coverage         | # Peptides  | # PS Ms | # Unique Peptides         | # Protein Groups    | # AAs          | MW [kDa]         | calc. pI              | Score Sequest HT              | # Peptides Sequest HT     |
|-----------------------|--------------------|-------------------------------------------------------------------------|--------------|-----------------|------------------|-------------|---------|---------------------------|---------------------|----------------|------------------|-----------------------|-------------------------------|---------------------------|
|                       |                    | Kelch-like ECH-associated protein 1<br>OS=Homo sapiens OX=9606 GN=KEAP1 |              | 1169.4          |                  |             | 169     |                           |                     |                |                  |                       |                               |                           |
| <i>Master Protein</i> | Q14145             | PE=1 SV=2                                                               | 0            | 15              | 92               | 67          | 0       | 67                        | 1                   | 624            | 69.6             | 6.44                  | 2216.53                       | 67                        |
| <i>Confidence</i>     | Sequence           | Modifications                                                           | Qvality PEP  | Quality q-value | # Protein Groups | # Prot eins | # PS Ms | Master Protein Accessions | # Missed Cleavage s | Theo. MH+ [Da] | XCorr Sequest HT | Confidence Sequest HT | Percolator q-Value Sequest HT | Percolator PEP Sequest HT |
|                       | FLPLSQCPEGAGDAVM   |                                                                         | 0.221        | 0.0067          |                  |             |         |                           |                     |                |                  |                       |                               |                           |
| <i>High</i>           | EVTPSQHGNR         | 2xP+K [C8; C23]                                                         | 107          | 89              | 1                | 1           | 1       | Q14145                    | 1                   | 4606           | 0.68             | High                  | 0.000286                      | 0.003679                  |
|                       | CVLHVMNGAVMYQIDS   |                                                                         | 0.013        |                 |                  |             |         |                           |                     |                |                  |                       |                               |                           |
| <i>High</i>           |                    | 2xOxidation [M6; M11]                                                   | 046          | 0               | 1                | 1           | 3       | Q14145                    | 0                   | 2166.05        | 2.25             | High                  | 0                             | 5.49E-06                  |
|                       | NNSPDGNTDSSALDCYN  |                                                                         | 0.030        |                 |                  |             |         |                           |                     | 3601.47        |                  |                       |                               |                           |
| <i>High</i>           | ^CAPMSVPR          | 2xOxidation [M19; M29]                                                  | 908          | 0               | 1                | 1           | 8       | Q14145                    | 0                   | 2              | 1.4              | High                  | 0                             | 3.7E-05                   |
|                       | SGLAGCVVGLLYAVG    |                                                                         | 0.000        |                 |                  |             |         |                           |                     | 2091.03        |                  |                       |                               |                           |
| <i>High</i>           |                    | 1xP+K [C6]                                                              | 71           | 0               | 1                | 1           | 3       | Q14145                    | 0                   | 2              | 2.92             | High                  | 0                             | 9.62E-09                  |
|                       |                    |                                                                         | 0.132        |                 |                  |             |         |                           |                     | 1786.73        |                  |                       |                               |                           |
| <i>High</i>           | LNSAECYPER         | 1xP+K [C6]                                                              | 884          | 0               | 1                | 1           | 3       | Q14145                    | 0                   | 6              | 1.2              | High                  | 0.000286                      | 0.002801                  |
|                       | EYIYMHFGEVAKQEEFF  |                                                                         | 0.108        |                 |                  |             |         |                           |                     | 4073.91        |                  |                       |                               |                           |
| <i>High</i>           | TLISR              | 1xP+K [C22]                                                             | 654          | 0               | 1                | 1           | 2       | Q14145                    | 1                   | 9              | 1.29             | High                  | 0                             | 0.000651                  |
|                       | ACSDFLVQQLDPSNAIGI |                                                                         | 0.317        | 0.0067          |                  |             |         |                           |                     | 4028.88        |                  |                       |                               |                           |
| <i>High</i>           | ^VELHQR            | 1xP+K [C2]                                                              | 631          | 89              | 1                | 1           | 1       | Q14145                    | 0                   | 9              | 0.89             | High                  | 0.000286                      | 0.009711                  |
|                       | IGVGVIDGHIYAVGGSH  |                                                                         | 0.004        |                 |                  |             |         |                           |                     | 3899.82        |                  |                       |                               |                           |
| <i>High</i>           | ^RYEPER            | 1xP+K [C19]                                                             | 547          | 0               | 1                | 1           | 2       | Q14145                    | 1                   | 9              | 2.11             | High                  | 0                             | 5.46E-07                  |

|      |                     |                                    |       |        |   |   |    |        |         |         |      |      |          |          |
|------|---------------------|------------------------------------|-------|--------|---|---|----|--------|---------|---------|------|------|----------|----------|
|      | IGVGVIDGHIYAVGGSH   |                                    | 0.014 |        |   |   |    |        | 3225.52 |         |      |      |          |          |
| High | ER                  | 1xP+K [C19]                        | 371   | 0      | 1 | 1 | 21 | Q14145 | 0       | 7       | 2.88 | High | 0.000286 | 0.006206 |
|      | IYVLGGYDGHTFLDSVE   |                                    |       |        |   |   |    |        | 3995.72 |         |      |      |          |          |
| High | WSEVTR              | 1xP+K [C18]                        | 3E-05 | 0      | 1 | 1 | 2  | Q14145 | 0       | 2       | 3.32 | High | 0        | 1E-11    |
|      | QEEFFNLSHCQLVTLISR  | 1xP+K [C10]                        | 0.016 |        |   |   |    |        | 2606.23 |         |      |      |          |          |
| High | QEEFFNLSHCQLVTLISR  | 1xP+K [C10]                        | 185   | 0      | 1 | 1 | 4  | Q14145 | 0       | 3       | 1.95 | High | 0        | 8.82E-06 |
|      | CVLHVMNGAVMYQIDS    |                                    | 0.000 |        |   |   |    |        | 2576.20 |         |      |      |          |          |
| High |                     | 1xP+K [C1]                         | 878   | 0      | 1 | 1 | 3  | Q14145 | 0       | 8       | 2.46 | High | 0        | 1.53E-08 |
|      | FLPLQSQCEGAGDAVM    |                                    | 0.000 |        |   |   |    |        | 4163.85 |         |      |      |          |          |
| High | EVTPSQHGNR          | 1xP+K [C]                          | 446   | 0      | 1 | 1 | 20 | Q14145 | 1       | 2       | 3.55 | High | 0        | 1.45E-08 |
|      | AREYTYMHFGEVAK      | 1xOxidation [M7]                   | 0.206 | 0.0067 |   |   |    |        | 1729.83 |         |      |      |          |          |
| High | AREYTYMHFGEVAK      | 1xOxidation [M7]                   | 335   | 89     | 1 | 1 | 2  | Q14145 | 1       | 7       | 1.53 | High | 0.000286 | 0.003086 |
|      | QAFGIMNELR          | 1xOxidation [M6]                   | 0.002 |        |   |   |    |        | 1194.59 |         |      |      |          |          |
| High | QAFGIMNELR          | 1xOxidation [M6]                   | 041   | 0      | 1 | 1 | 12 | Q14145 | 0       | 4       | 2.13 | High | 0        | 9.57E-08 |
|      | EYTYMHFGEVAK        | 1xOxidation [M5]                   | 0.005 |        |   |   |    |        | 1502.69 |         |      |      |          |          |
| High | EYTYMHFGEVAK        | 1xOxidation [M5]                   | 929   | 0      | 1 | 1 | 9  | Q14145 | 0       | 8       | 2.92 | High | 0        | 1.09E-06 |
|      | SGAGVCLHNCIYAAGG    |                                    |       |        |   |   |    |        |         |         |      |      |          |          |
|      | ISVERYDVETETWTFVAPM |                                    | 0.001 |        |   |   |    |        | 4810.18 |         |      |      |          |          |
| High |                     | 1xOxidation [M43]                  | 405   | 0      | 1 | 1 | 6  | Q14145 | 1       | 6       | 2.83 | High | 0        | 4.24E-08 |
|      | EQGMEVVSIEGIHPKVM   |                                    | 0.002 |        |   |   |    |        | 2184.07 |         |      |      |          |          |
| High |                     | 1xOxidation [M4]                   | 269   | 0      | 1 | 1 | 1  | Q14145 | 1       | 9       | 4.02 | High | 0        | 1.2E-07  |
|      | EQGMEVVSIEGIHPK     | 1xOxidation [M4]                   | 9.22E |        |   |   |    |        | 1668.82 |         |      |      |          |          |
| High | EQGMEVVSIEGIHPK     | 1xOxidation [M4]                   | -05   | 0      | 1 | 1 | 20 | Q14145 | 0       | 6       | 3.51 | High | 0        | 1.29E-07 |
|      | AMFTNGLR            | 1xOxidation [M2]                   | 0.067 |        |   |   |    |        |         |         |      |      |          |          |
| High | AMFTNGLR            | 1xOxidation [M2]                   | 597   | 0      | 1 | 1 | 6  | Q14145 | 0       | 925.456 | 1.92 | High | 0        | 0.000216 |
| High | FLPLQSQCEGAGDAVM    | 1xOxidation [M17]; 2xP+K [C8; C23] | 0.037 | 0      | 1 | 1 | 1  | Q14145 | 1       | 4621.99 | 1.68 | High | 0        | 5.65E-05 |

|      |                    |                               |       |        |   |   |    |        |         |   |      |      |          |          |
|------|--------------------|-------------------------------|-------|--------|---|---|----|--------|---------|---|------|------|----------|----------|
|      | EVTPSQHGNR         |                               | 384   |        |   |   |    |        | 4       |   |      |      |          |          |
|      | FLPLQSQCPEGAGDAVM  |                               | 0.000 |        |   |   |    |        | 3737.69 |   |      |      |          |          |
| High | EVTPSQHGNR         | 1xOxidation [M17]             | 798   | 0      | 1 | 1 | 8  | Q14145 | 1       | 9 | 3.14 | High | 0        | 1.24E-08 |
|      |                    |                               | 6.15E |        |   |   |    |        | 1832.84 |   |      |      |          |          |
| High | YDVETETWTFVAPMK    | 1xOxidation [M14]             | -05   | 0      | 1 | 1 | 28 | Q14145 | 0       | 1 | 2.94 | High | 0        | 6.39E-10 |
|      |                    |                               | 5.9E- |        |   |   |    |        | 2158.03 |   |      |      |          |          |
| High | YEPERDEWHLVAPMLTR  | 1xOxidation [M14]             | 05    | 0      | 1 | 1 | 25 | Q14145 | 1       | 9 | 4.3  | High | 0        | 4.34E-11 |
|      | IFEELTLHKPTQVMPCRA |                               | 0.174 | 0.0067 |   |   |    |        | 2354.23 |   |      |      |          |          |
| High |                    | 1xOxidation [M14]             | 098   | 89     | 1 | 1 | 1  | Q14145 | 1       | 6 | 1.36 | High | 0.000286 | 0.002022 |
|      |                    |                               | 0.109 |        |   |   |    |        | 1675.82 |   |      |      |          |          |
| High | LIEFAYTASISMGEK    | 1xOxidation [M12]             | 135   | 0      | 1 | 1 | 6  | Q14145 | 0       | 5 | 1.57 | High | 0        | 0.000657 |
|      | CHSLTPNFLQMLQKCEI  |                               | 0.065 |        |   |   |    |        | 2835.35 |   |      |      |          |          |
| High |                    | 1xOxidation [M11];1XP+K (C16) | 175   | 0      | 1 | 1 | 3  | Q14145 | 1       | 9 | 2.46 | High | 0.000286 | 0.005691 |
|      |                    |                               | 0.000 |        |   |   |    |        | 1493.68 |   |      |      |          |          |
| High | YQDAPAAQFMAHK      | 1xOxidation [M10]             | 186   | 0      | 1 | 1 | 15 | Q14145 | 0       | 4 | 3.43 | High | 0        | 8.3E-06  |
|      | YQDAPAAQFMAHKVVL   |                               | 0.256 | 0.0067 |   |   |    |        | 2608.32 |   |      |      |          |          |
| High |                    | 1xOxidation [M10]             | 904   | 89     | 1 | 1 | 1  | Q14145 | 1       | 3 | 1.13 | High | 0.000286 | 0.005449 |
|      | NNSPDGNTDSSALDCYN  |                               | 0.000 |        |   |   |    |        | 3585.47 |   |      |      |          |          |
| High | CAPMSVPR           | 1xOxidation [M]               | 481   | 0      | 1 | 1 | 22 | Q14145 | 0       | 7 | 2.49 | High | 0        | 1.39E-06 |
|      |                    |                               | 0.004 |        |   |   |    |        | 1066.53 |   |      |      |          |          |
| High | MITAMNTIR          | 1xOxidation [M]               | 77    | 0      | 1 | 1 | 17 | Q14145 | 0       | 8 | 2.48 | High | 0        | 1.6E-05  |
|      | CVLHVMNGAVMYQIDS   |                               | 0.004 |        |   |   |    |        | 2150.05 |   |      |      |          |          |
| High |                    | 1xOxidation [M]               | 547   | 0      | 1 | 1 | 2  | Q14145 | 0       | 6 | 1.09 | High | 0        | 5.48E-07 |

**Table S2. MS/MS analysis of peptides (IGVGVIDGHIYAVGGSHGCIHHNSVERYEPER).**

| #1 | b <sup>+</sup> | b <sup>2+</sup> | b <sup>3+</sup> | b <sup>4+</sup> | b <sup>5+</sup> | Seq.  | y <sup>+</sup> | y <sup>2+</sup> | y <sup>3+</sup> | y <sup>4+</sup> | y <sup>5+</sup> | #2 |
|----|----------------|-----------------|-----------------|-----------------|-----------------|-------|----------------|-----------------|-----------------|-----------------|-----------------|----|
| 1  | 114.09134      | 57.54931        | 38.70196        | 29.27829        | 23.62409        | I     |                |                 |                 |                 |                 | 27 |
| 2  | 171.11280      | 86.06004        | 57.70912        | 43.53366        | 35.02838        | G     | 3112.44298     | 1556.72513      | 1038.15251      | 778.86620       | 623.29442       | 26 |
| 3  | 270.18122      | 135.59425       | 90.73192        | 68.30076        | 54.84206        | V     | 3055.42151     | 1528.21439      | 1019.14536      | 764.61084       | 611.89012       | 25 |
| 4  | 327.20268      | 164.10498       | 109.73908       | 82.55613        | 66.24636        | G     | 2956.35310     | 1478.68019      | 986.12255       | 739.84373       | 592.07644       | 24 |
| 5  | 426.27110      | 213.63919       | 142.76188       | 107.32323       | 86.06004        | V     | 2899.33163     | 1450.16946      | 967.11540       | 725.58837       | 580.67215       | 23 |
| 6  | 539.35516      | 270.18122       | 180.45657       | 135.59425       | 108.67685       | I     | 2800.26322     | 1400.63525      | 934.09259       | 700.82126       | 560.85847       | 22 |
| 7  | 654.38210      | 327.69469       | 218.79889       | 164.35098       | 131.68224       | D     | 2687.17916     | 1344.09322      | 896.39790       | 672.55025       | 538.24165       | 21 |
| 8  | 711.40357      | 356.20542       | 237.80604       | 178.60635       | 143.08653       | G     | 2572.15221     | 1286.57975      | 858.05559       | 643.79351       | 515.23626       | 20 |
| 9  | 848.46248      | 424.73488       | 283.49234       | 212.87108       | 170.49832       | H     | 2515.13075     | 1258.06901      | 839.04843       | 629.53814       | 503.83197       | 19 |
| 10 | 961.54654      | 481.27691       | 321.18703       | 241.14209       | 193.11513       | I     | 2378.07184     | 1189.53956      | 793.36213       | 595.27342       | 476.42019       | 18 |
| 11 | 1124.60987     | 562.80857       | 375.54147       | 281.90793       | 225.72780       | Y     | 2264.98777     | 1132.99753      | 755.66744       | 567.00240       | 453.80338       | 17 |
| 12 | 1195.64698     | 598.32713       | 399.22051       | 299.66720       | 239.93522       | A     | 2101.92445     | 1051.46586      | 701.31300       | 526.23657       | 421.19071       | 16 |
| 13 | 1294.71540     | 647.86134       | 432.24332       | 324.43431       | 259.74890       | V     | 2030.88733     | 1015.94730      | 677.63396       | 508.47729       | 406.98329       | 15 |
| 14 | 1351.73686     | 676.37207       | 451.25047       | 338.68967       | 271.15319       | G     | 1931.81892     | 966.41310       | 644.61116       | 483.71019       | 387.16960       | 14 |
| 15 | 1408.75833     | 704.88280       | 470.25763       | 352.94504       | 282.55749       | G     | 1874.79745     | 937.90237       | 625.60400       | 469.45482       | 375.76531       | 13 |
| 16 | 1495.79035     | 748.39882       | 499.26830       | 374.70305       | 299.96389       | S     | 1817.77599     | 909.39163       | 606.59685       | 455.19946       | 364.36102       | 12 |
| 17 | 1632.84927     | 816.92827       | 544.95461       | 408.96777       | 327.37567       | H     | 1730.74396     | 865.87562       | 577.58617       | 433.44145       | 346.95461       | 11 |
| 18 | 1689.87073     | 845.43900       | 563.96176       | 423.22314       | 338.77997       | G     | 1593.68505     | 797.34616       | 531.89987       | 399.17672       | 319.54283       | 10 |
| 19 | 2235.02751     | 1118.01740      | 745.68069       | 559.51234       | 447.81132       | C-P+K | 1536.66359     | 768.83543       | 512.89271       | 384.92135       | 308.13854       | 9  |
| 20 | 2348.11158     | 1174.55943      | 783.37538       | 587.78335       | 470.42814       | I     | 991.50680      | 496.25704       | 331.17379       | 248.63216       | 199.10718       | 8  |
| 21 | 2485.17049     | 1243.08888      | 829.06168       | 622.04808       | 497.83992       | H     | 878.42274      | 439.71501       | 293.47910       | 220.36114       | 176.49037       | 7  |
| 22 | 2622.22940     | 1311.61834      | 874.74798       | 656.31281       | 525.25170       | H     | 741.36383      | 371.18555       | 247.79279       | 186.09641       | 149.07859       | 6  |
| 23 | 2736.27233     | 1368.63980      | 912.76229       | 684.82354       | 548.06029       | N     | 604.30491      | 302.65610       | 202.10649       | 151.83169       | 121.66680       | 5  |
| 24 | 2823.30436     | 1412.15582      | 941.77297       | 706.58155       | 565.46669       | S     | 490.26199      | 245.63463       | 164.09218       | 123.32095       | 98.85822        | 4  |

|    |            |            |            |           |           |   |           |           |           |           |          |   |
|----|------------|------------|------------|-----------|-----------|---|-----------|-----------|-----------|-----------|----------|---|
| 25 | 2922.37277 | 1461.69002 | 974.79577  | 731.34865 | 585.28038 | V | 403.22996 | 202.11862 | 135.08150 | 101.56295 | 81.45181 | 3 |
| 26 | 3051.41536 | 1526.21132 | 1017.80997 | 763.60930 | 611.08889 | E | 304.16155 | 152.58441 | 102.05870 | 76.79584  | 61.63813 | 2 |
| 27 |            |            |            |           |           | R | 175.11895 | 88.06311  | 59.04450  | 44.53520  | 35.82961 | 1 |

---
